# Supplementary material for: A cobalt Schiff base with ionic substituents on the ligand as an efficient catalyst for the oxidation of 4-methyl guaiacol to vanillin
Source: Royal Society of Chemistry journal article supplement (doi:10.1039/c2gc36049g), 2012-01-01
Supplement: c2gc36049g.pdf [file c2gc36049g.pdf]

Electronic Supplementary Information

**Cobalt Schiff base with ionic substituents on ligand as an efficient catalyst for the oxidation of 4-methyl guaiacol to vanillin**

Jinghui Hu<sup>a</sup>, Yifan Hu<sup>a</sup>, Jianyong Mao<sup>b</sup>, Jia Yao<sup>b</sup>, Zhirong Chen<sup>a</sup>, Haoran Li<sup>a,b,\*</sup>

<sup>a</sup>State Key Laboratory of Chemical Engineering, Department of Chemical and Biological Engineering, Zhejiang University, Hangzhou, 310027, P. R. China

<sup>b</sup>Department of Chemistry, Zhejiang University, Hangzhou 310027, P. R. China

\*Corresponding Author. Email: [lihr@zju.edu.cn](mailto:lihr@zju.edu.cn)

| <b>Supporting information</b>                                         | <b>Page</b> |
|-----------------------------------------------------------------------|-------------|
| 1. Experimental materials and methods                                 | S2          |
| 2. Reaction medium analysis                                           | S2          |
| 3. The liquid phase spectrogram of the 5h reaction solution           | S3          |
| 4. The corresponding mass spectrogram of the above liquid phase peaks | S3-S4       |
| 5. Effect of temperature                                              | S4-S5       |

## 1. Experimental materials and methods

All the chemicals were of AR grade. They were commercially purchased from Sigma-Aldrich, Acros and used without further treatment. FT-IR spectra were recorded on a Bruker APEX-III spectrometer using KBr pellets in 400-4000 $\text{cm}^{-1}$  region. ESI-MS analysis was performed on a Bruker Esquire 3000 (Bruker-Franzen Analytik, Bermen, Germany) equipped with an ion trap analyzer system. ICP-MS (Inductively Coupled Plasma-Mass Spectrometry) analysis was performed on a Perkin-Elmer ELAN 6100, equipped with a standard pneumatic nebulizer and an automatic sampler as used. Indium was used as internal standard in order to correct potential instrument drift.

## 2. Reaction medium analysis

A 5.0 cm diameter, two-bladed impeller was used for stirring at approximately 1000 r.p.m. The end of the tube was positioned about 1 cm above the impeller blades. The mixture was left to stabilize at this temperature for a further 1 h, and then the oxygen was introduced (40 ml min<sup>-1</sup>) to initiate the reaction. About 0.5 ml of sample withdrawn from the reaction mixture was acidified by hydrochloric acid (1:1, volume ratio) to pH =2~3 and diluted with methanol. The diluted sample was analyzed on a HPLC (DIONEX, Ultamate3000, RP-18 column 25 cm column, UV 279 nm). The definition of conversion, selectivity and isolated yield are as follows: conversion = amount of reactant consumed divided by the amount of reactant charged; selectivity = the amount of a particular product formed divided by the total amount of reactant consumed; isolated yield= the amount of a isolated particular product divided by the total amount of reactant charged. It should be noted that the sample should be analyzed immediately after acidification to avoid autoxidation.

### 3. The liquid phase spectrogram of the 5h reaction solution.

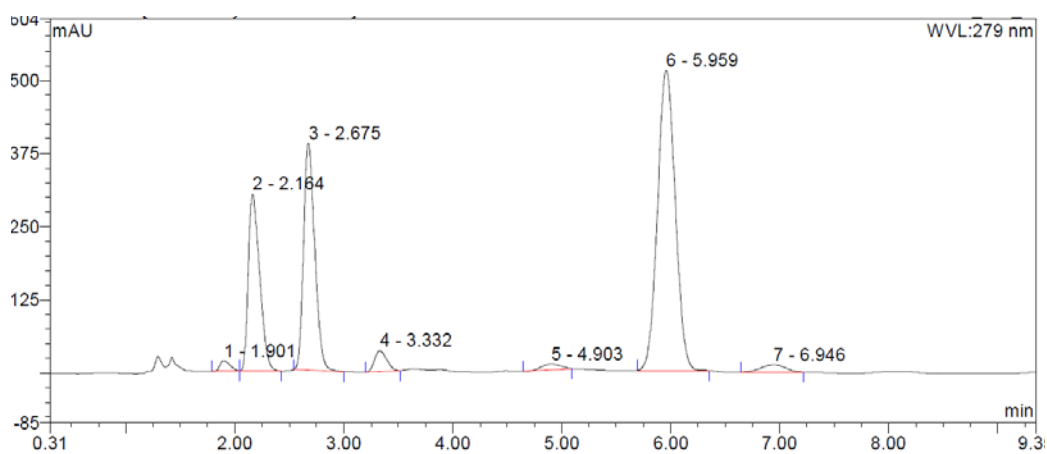

Analysis contions: HPLC-MS (chrompak: kromasil 100-5, C18, 150\*4.6mm, E30334. Dionex Summit HPLC and Applied Biosystem API2000 combined), Mobile phase Methanol: Water=50:50(V/V), T=40°C, UV 279nm.

### 4. The corresponding mass spectrogram of the above liquid phase peaks.

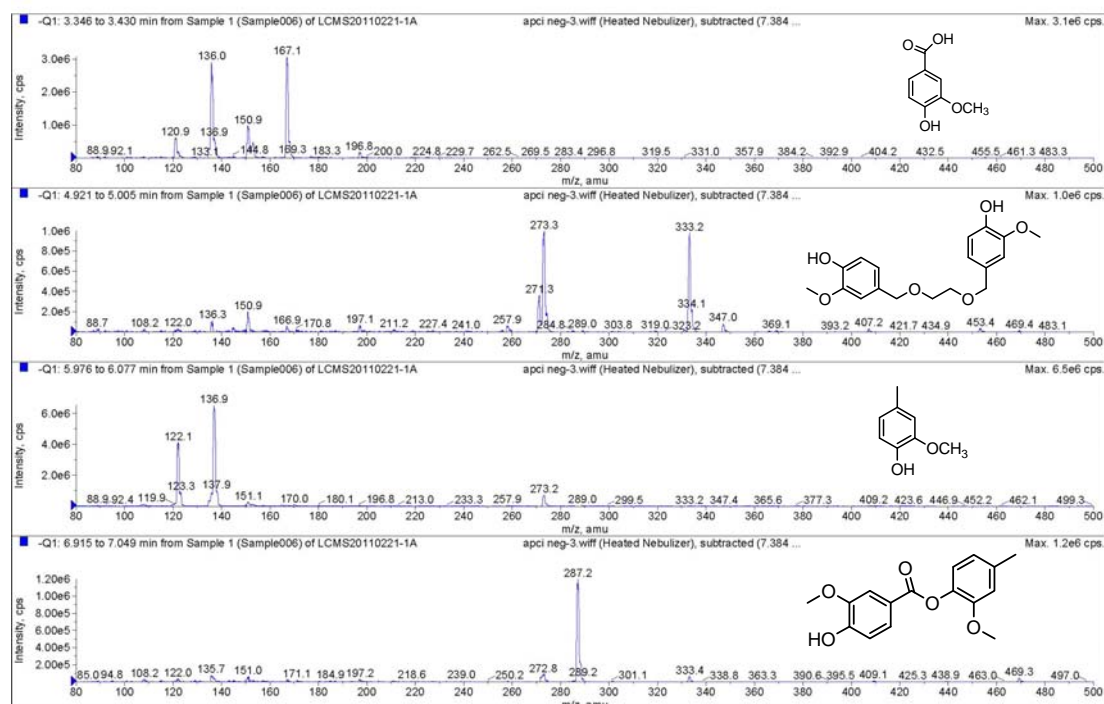

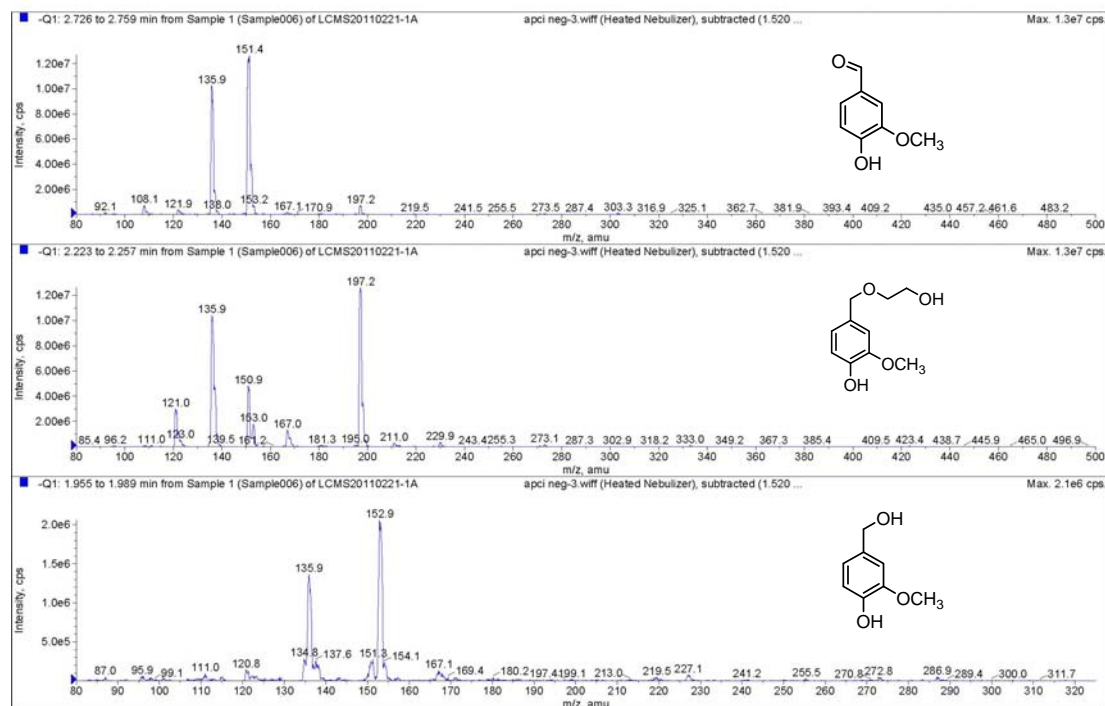

## 5. Effect of temperature

To determine whether reaction temperatures have any significant effect on the oxidation, reaction temperatures from 55 °C to 95 °C (Table 1, entries 1–5) were investigated. It seems that the reaction time and selectivity increased as the temperature decreased from 95 °C to 65 °C, and the selectivity reached a maximum at 65 °C and then decreased. However, when the temperature was lower than 65 °C, the reaction time increased remarkably. This may be the fact that higher temperature enhanced gas-liquid transfer and shortened the reaction time. However, when the temperature was higher than 85 °C, the over-oxidation product increased remarkably. Those results showed that temperature was also a key factor in this reaction, where a suitable temperature was 75 °C for the Co-[Salen-Py][PF<sub>6</sub>]<sub>2</sub> catalyst system.

**Table S1.** Influence of temperature in the oxidation of 2-methoxy-4-methyl phenol

| Entry | Temperature (°C) | Time (h) | Conv. (%) | Sel. (%) |
|-------|------------------|----------|-----------|----------|
| 1     | 55               | 42       | 100       | 82       |
| 2     | 65               | 30       | 100       | 90       |
| 3     | 75               | 18       | 100       | 86       |
| 4     | 85               | 15       | 100       | 75       |
| 5     | 95               | 9        | 100       | 70       |

Reaction conditions: 4-methyl guaiacol (40g; 290 mmol), molecular oxygen flow rate (40ml/min), stirring rate 1000 r.p.m., NaOH (38.3 g; 957 mmol), ethylene glycol (155 g), water 20g, Co-[Salen-Py][PF<sub>6</sub>]<sub>2</sub> (1.0 g; 1.38 mmol).
